# Supplementary material for: Organoruthenium(ii) and (iii) amidinates, (η5-C5Me5)Ru(η-amidinate) and (η5-C5Me5)RuCl(η-amidinate), as unique redox catalysts for the intramolecular Kharasch reactions: Facile access to a pyrrolizidine alkaloid skeleton under mild conditionsElectronic supplementary information (ESI) available: representative experimental details and crystallographic data. See http://www.rsc.org/suppdata/cc/b2/b209369c/
Source: Royal Society of Chemistry journal article supplement (doi:10.1039/b209369c), 2003-01-14
Supplement: b209369c.doc [file b209369c.doc]

Supporting Information for

Organoruthenium (II) and (III) amidinates, (5-C5Me5)Ru(-amidinate) and　(5-C5Me5)RuCl(-amidinate), as unique redox catalysts for intramolecular Kharasch reactions: Facile access to a pyrrolizidine alkaloid skeleton under mild conditions

Hideo Nagashima,*a-c Mitsuru Gondo,b Satoshi Masuda,b Hideo Kondo,c Yoshitaka Yamaguchi,c and Kouki Matsubaraa,c

*Institute of Advanced Material Studya and Graduate School of Engineering Sciences,b and CREST, Japan Promotion of Science and Technology (JST),c Kyushu University, Kasuga, Fukuoka 816-8580, Japan. Fax: 81-92-583-7819; Tel: 81-92-583-7819; E-mail:nagasima@cm.kyushu-u.ac.jp*

------------------------------

1. Representative experimental details

(1) Preparation of a Ru(III) amidinate (**2**) ----- page 2

(2) General procedure for the cyclization of N-allyl trichloroacetamides ----- page 2

(3) Preparation of a pyrrolizidine alkaloid skeleton **8**  ----- page 3

2. Crystallographic data

S-1 Molecular Structure and Crystallographic Data for **2** -----page 5

S-2 Molecular Structure and Crystallographic Data for **8** -----page 9

1. Preparation of a Ru(III) amidinate (**2**)

**General Methods.** All manipulations were carried out under a dry argon or nitrogen atmosphere using the combination of a nitrogen-filled glove box, high-vacuum line, and Schlenk techniques. All of solvents were distilled from drying reagents (Na/Ph2CO for THF, pentane, benzene, and C6D6; CaH2 for CH2Cl2, CHCl3, 1,2-dichloroethane, iPrOH, and DMSO; molecular sieves for Et3N) just before use. Cuprous chloride (CuCl) was prepared from CuCl2 hydrate, and stored under a dry argon atmosphere. (5-C5Me5)Ru(-iPrN-C(Me)=NiPr) (**1**)was prepared according to the literature [Y. Yamaguchi, H. Nagashima, *Organometallics* *2000*, 19, 725-727]. 1H NMR spectra were taken with a JEOL Lambda 395, 400, and 600 spectrometer at room temperature, chemical shifts are recorded in ppm from the solvent signal. Column chromatography was conducted with Wakogel FC-40, whereas thin-layer chromatography was carried out with Merck Silicagel 60 F254.

**(5-C5Me5)Ru(-iPrN-C(Me)=NiPr)Cl (2):**

*Method A.* In a 5 NMR tube was placed (5-C5Me5)Ru(amidinate) (**1**) (19mg,0.05 mmol) and THF-d8 was introduced using the vacuum transfer technique. Under an argon atmosphere, CHCl3 (8l, 0.10 mmol, 2 eq. to **1**) was added through microsyringe at -78 oC. The solution was allowed to warm to room temperature slowly. After 1 h, a dark green solution containing (5-C5Me5)Ru(amidinate)Cl (**2**) was obtained (50% yield based on integral values of the peaks in 1H NMR). Although fractional recrystallization of this crude sample afforded **1** in pure form, Method B described below is better to synthesize **2** in quantity.

*Method B.* Treatment of [(5-C5Me5)RuCl2]2 (220 mg,0.72 mmol) with Li****iPrN-C(Me)=NiPr] in THF (30 mL) at -78 oC was followed by additional stirring of the reaction mixture for 1 h, during which the solution was allowed to warm to room temperature slowly. After removal of the solvent, the residue was extracted with pentane. Combined extracts were concentrated and the formed solid was purified by recrystallization from pentane at -30 oC. The desired product **2** was obtained in 54 % yield (160 mg) as green microcrystals. mp 122.3 oC (dec.); 1H NMR ( C6D6 ) 27.51 ~ 25.05 ( br, 15H ), -4.45 ~ -7.02 ( br, *J*= 14.7 Hz, 12H ), -9.94 ~ -11.36 ( br, 3H ); 13C NMR ( C6D6 ) ; IR ( KBr ) 1645 cm-1 ( C=N ); Anal. Calcd for C18H32N2ClRu: C 52.35; H 7.81; N 6.78. Found: C 52.57; H 7.88; N 6.77.

(2) General procedure for the cyclization of N-allyltrichloroacetamides

In a typical example, **1** (7.6 mg, 0.02 mmol) and N-benzyl-N-allyltrichloroacetamide (**3a**) (59 mg, 0.2 mmol) were placed in a 20 mL flask, and carefully degassed benzene (1 mL) was added under an argon atmosphere. After stirring the mixture for 4 h at room temperature, the solution was passed through a short pad of silica-gel eluted by ether. The obtained colorless eluents were concentrated to give the desired lactam(**4a**) in 85% yield (50 mg). colorless solid; mp 88.5 – 89.5 oC; 1H NMR ( CDCl3 ) 7.50 - 7.28 ( m, 5H, Ph ), 4.64, 4.45 ( each d, *J*= 14.7 Hz, each 1H, CH2Ph ), 3.97 ( dd, *J*= 11.2, 3.9 Hz, 1H, one of NCH2 ), 3.68 ( dd, *J*= 11.2, 6.3 Hz, 1H, another NCH2 ), 3.47 ( dd, *J*= 10.8, 5.9 Hz, 1H, one of CH2Cl ), 3.10 ( dd, *J*= 10.8, 8.3 Hz, 1H, another CH2Cl ), 3.15 – 3.02 ( m, 1H, -H ); 13C NMR ( CDCl3 ) 165.6 ( C=O ), 134.1, 128.7, 128.0, 127.8 ( Ph ), 83.3 (  ), 51.2, 47.5, 46.9, 40.7 (  -CH2Cl, CH2Ph ); IR ( CH2Cl2 ) 1725 cm-1 ( C=O ); Anal. Calcd for C12H12NOCl3: C 49.26; H4.13; N 5.47.Found: C 49.31; H 4.13; N 4.80.

(3) Preparation of a pyrrolizidine alkaloid skeleton **8**

**(2S)-*N*-Cbz-2-vinylpyrrolidine**.

Optically active N-Cbz-2-formylpyrrolidine ([α]D observed : –76.9) was prepared according to the literature. (Seijas et. al., *Tetrahedron*, 1992, **48**, 1637). A mixture of RhCl(PPh3)3 (63.4 mg 0.064 mmol)、PPh3（373.9 mg, 1.42mmol）, 2-propanol （0.13 ml、1.74 mmol）, and N-Cbz-2-formylpyrrolidine (300 mg, 1.29 mmol) was dissolved in THF (7 mL). To this solution, a hexane solution of TMSCHN2 (2M, 0.9 ml, 1.8mmol) was added dropwise slowly, and the mixture was stirred at room temperature overnight. Then, H2O2 aq. (3 %, 4 mL) was added and the mixture was stirred for 0.5-1 h, during which the reaction was periodically monitored by TLC. After the reaction was complete, excess H2O2 was decomposed by NaHSO3 aq., and the mixture was extracted with CH2Cl2. The combined extracts were washed with brine, dried over MgSO4, and concentrated. The residue was purified by column chromatography to afford (2S)-*N*-trichloroacetyl-2-vinyl-pyrrolidine (184 mg, 62%). [α]D –14.7 (lit. -9).　IR (film NaCl) ν 2981, 1701, 1455, 1418. 1H-NMR (CDCl3)σ7.34 (br-s, 5H), 5.78 (m, 1H), 5.18-5.08(m, 4H), 3.47 (br-s, 4H), 2.06-1.73 (m, 4H). Ms m/z (FAB) 232.

**(2S)-*N*-trichloroacetyl-2-vinylpyrrolidine (7)**

Treatment of　(2S)-*N*-Cbz-2-vinyl-pyrrolidine (36 mg, 0.16mmol) with 30% HBr-AcOH　(0.19ml, 0.96mmol) at 0oC was followed by stirring of the reaction mixture at room temperature for 4 h. After removal of the volatiles, the residue was dissolved in CH2Cl2, and DMAP (65.1 mg, 0.54ml) and CCl3COCl (0.06ml, 0.54mmol) were added at 0oC. The mixture was stirred at room temperature overnight. The mixture was poured into water, and extracted with CH2Cl2. The combined extracts were washed with 10% HCl aq and brine, and dried over Na2SO4. After concentration, the residue was purified by column chromatography to give 7**5** (31 mg, 77%) as a slightly yellow oil. [α]D –26.8 (lit.-18)　IR (film NaCl) ν 2958, 2357, 1671, 1403. 1H-NMR (CDCl3)σ5.77 (m, 1H), 5.17(m, 2H), 4.71 (m, 1H), 3.94 (m, 2H), 2.05 (m, 3H), 1.78 (m, 1H). Ms m/z (FAB) 241.

**Preparation of (1R,8S)-1-chlorometyl-2-dichloro-3-oxo-hexahydropyrrolizidine (8)**

*Method A (CuCl/bipy as the catalyst).* A mixture of CuCl and **7** (72 mg, 0.30 mmol) dissolved in 1,2-dichloroethane (1 mL, 0.56 mmol) was heated at 80oC with stirring. A 1,2-dichloroethane solution of bipyridine (8.8 mg, 0.56 mmol) was added through syringe, and the mixture was stirred at this temperature for 2 h. The reaction mixture was passed through a short pad of silica-gel eluting by dichloromethane to form 6 as white solids (52 mg, 87%).

*Method B (****1*** *as the catalyst).* Into a schlenk tube, **7** (21 mg, 0.087 mmol) and **1** (9.9 mg, 0.024 mmol) were weighed in a globe box. Benzene was transferred in vacuum, and the mixture was stirred at room temperature for 12 h with stirring under an argon atmosphere. After removal of the catalyst by a short silica-gel column, **8** was obtained in 95% yield (20 mg).

*Method C (****2*** *as the catalyst).* Into a Schlenk tube, **7** (19 mg, 0.080 mmol) and **2** (9.9 mg, 0.024 mmol) were weighed in a globe box. Benzene was transferred in vacuum, and the mixture was stirred at room temperature for 3 h with stirring under an argon atmosphere. After removal of the catalyst by a short silica-gel column, **8** was obtained in 85% yield (17 mg).

**(1R,8S)-1-chlorometyl-2-dichloro-3-oxo-hexahydropyrrolizidine (8).** mp 68 ℃ [α]D –35.6 (lit.-24) IR (film NaCl) ν 2961, 1729, 1420. 1H-NMR (CDCl3)σ3.99 (dd, 1H), 3.86 (dd, 1H), 3.62 (m, 1H), 3.54 (m, 1H), 3.29 (m, 1H), 2.76 (m, 2H) , 2.76 (m, 2H), 2.17 (m, 2H), 1.61 (m, 1H). 13C-NMR (CDCl3)σ 164.10, 87.02, 62.92, 61.28, 41.77, 40.60, 31.51, 26.66. Ms m/z (FAB) 242.

**Determination of the stereochemistry of 8.** Stereochemistry between the angular proton and the adjacent chloromethyl group in **8** was confirmed by differential NOE experiments. The crystallographic study of **8** unequivocally supported this conclusion as shown in Fig. S-2. Absolute configuration of **8** was determined by crystallography solved by SHELXL-97, in which the Flack parameter was as low as 0.07 (8).

2. Crystallographic data

**S-1 Molecular Structure and Crystallographic Data for 2**


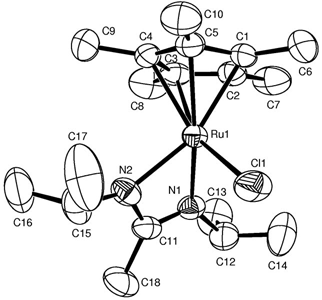


**Figure S-1.** ORTEP drawing of **2** with 50 % thermal ellipsoids.

**Table S-1-1** Crystal data and structure refinement for **2**.

Identification codenhk163

Empirical formulaC18 H32 Cl N2 Ru

Formula weight412.98

Temperature293(2) K

Wavelength0.71069 Å

Crystal system Monoclinic

Space group P21/n

Unit cell dimensionsa = 13.149(2)Å  = 90

b = 9.255(3)Å  = 90.473(14)

c = 16.412(3)Å  = 90

Volume1997.2(8) Å

Z4

Density (calculated)1.373 Mg/m

Absorption coefficient0.918 mm

F(000)860

Crystal size0.300 x 0.230 x 0.100 mm

Theta range for data collection2.53 to 27.50 .

Index ranges-17<=h<=17; 0<=k<=12; -21<=l<=0

Reflections collected4728

Independent reflections4573 [R(int) = 0.0509]

Reflections observed (>2)2343

Refinement methodFull-matrix least-squares on F

Data / restraints / parameters4573 / 0 / 199

Goodness-of-fit on F0.970

Final R indices [I>2(I)]R = 0.0399 wR = 0.0924

R indices (all data)R = 0.1410 wR = 0.1159

Largest diff. peak and hole0.630 and -0.626 e.Å

**Table S-1-2** Atomic coordinates ( x 10) and equivalent isotropic displacement parameters (Å x 10) for **2**.U(eq) is defined as one third of the trace of the orthogonalized Uij tensor.

Atom x y z U(eq)

Ru(1)7338(1)2401(1)4526(1)35(1)

Cl(1)7374(1)-49(2)4067(1)65(1)

N(1)8310(3)1901(5)5505(3)43(1)

N(2)8905(3)2625(5)4372(3)47(1)

C(1)5695(4)2697(5)4260(3)44(1)

C(2)5944(4)3292(6)5035(3)47(1)

C(3)6658(4)4433(6)4911(3)47(1)

C(4)6832(4)4539(5)4048(3)43(1)

C(5)6252(4)3452(6)3662(3)44(1)

C(6)4956(5)1503(7)4094(4)68(2)

C(7)5422(5)2955(8)5823(4)77(2)

C(8)7052(6)5467(7)5531(4)80(2)

C(9)7464(5)5678(7)3644(5)73(2)

C(10)6165(5)3190(8)2756(4)69(2)

C(11)9144(4)2122(5)5099(3)43(1)

C(12)8282(5)1225(7)6310(4)58(2)

C(13)8115(6)2305(8)6970(4)83(2)

C(14)7515(6)34(8)6315(5)94(3)

C(15)9636(5)2768(7)3712(4)63(2)

C(16)10143(5)4243(9)3697(5)93(3)

C(17)9165(7)2374(10)2929(5)115(3)

C(18)10209(5)1867(7)5413(4)69(2)

**Table S-1-3** Bond lengths [Å] and angles [] for **2**.

Ru(1)-N(2)2.088(4)

Ru(1)-N(1)2.096(4)

Ru(1)-C(3)2.178(5)

Ru(1)-C(2)2.182(5)

Ru(1)-C(1)2.217(5)

Ru(1)-C(5)2.228(5)

Ru(1)-C(4)2.228(5)

Ru(1)-Cl(1)2.3896(16)

Ru(1)-C(11)2.560(5)

N(1)-C(11)1.305(7)

N(1)-C(12)1.461(7)

N(2)-C(11)1.316(7)

N(2)-C(15)1.462(7)

C(1)-C(5)1.415(7)

C(1)-C(2)1.421(7)

C(1)-C(6)1.495(7)

C(2)-C(3)1.429(7)

C(2)-C(7)1.501(8)

C(3)-C(4)1.439(7)

C(3)-C(8)1.487(8)

C(4)-C(5)1.410(7)

C(4)-C(9)1.500(7)

C(5)-C(10)1.510(8)

C(11)-C(18)1.507(7)

C(12)-C(13)1.492(8)

C(12)-C(14)1.494(9)

C(15)-C(17)1.467(10)

C(15)-C(16)1.520(9)

N(2)-Ru(1)-N(1)61.23(17)

N(2)-Ru(1)-C(3)110.92(19)

N(1)-Ru(1)-C(3)102.58(18)

N(2)-Ru(1)-C(2)147.3(2)

N(1)-Ru(1)-C(2)107.39(19)

C(3)-Ru(1)-C(2)38.3(2)

N(2)-Ru(1)-C(1)157.60(18)

N(1)-Ru(1)-C(1)139.90(19)

C(3)-Ru(1)-C(1)63.18(19)

C(2)-Ru(1)-C(1)37.69(19)

N(2)-Ru(1)-C(5)120.47(19)

N(1)-Ru(1)-C(5)165.43(18)

C(3)-Ru(1)-C(5)62.9(2)

C(2)-Ru(1)-C(5)62.8(2)

C(1)-Ru(1)-C(5)37.13(18)

N(2)-Ru(1)-C(4)99.28(18)

N(1)-Ru(1)-C(4)130.11(18)

C(3)-Ru(1)-C(4)38.10(19)

C(2)-Ru(1)-C(4)63.2(2)

C(1)-Ru(1)-C(4)62.18(19)

C(5)-Ru(1)-C(4)36.88(18)

N(2)-Ru(1)-Cl(1)91.95(13)

N(1)-Ru(1)-Cl(1)91.09(12)

C(3)-Ru(1)-Cl(1)156.90(15)

C(2)-Ru(1)-Cl(1)119.87(16)

C(1)-Ru(1)-Cl(1)94.40(14)

C(5)-Ru(1)-Cl(1)103.14(15)

C(4)-Ru(1)-Cl(1)137.55(14)

N(2)-Ru(1)-C(11)30.81(17)

N(1)-Ru(1)-C(11)30.52(16)

C(3)-Ru(1)-C(11)111.25(18)

C(2)-Ru(1)-C(11)132.63(19)

C(1)-Ru(1)-C(11)169.77(19)

C(5)-Ru(1)-C(11)149.92(19)

C(4)-Ru(1)-C(11)119.49(17)

Cl(1)-Ru(1)-C(11)89.98(11)

C(11)-N(1)-C(12)123.8(5)

C(11)-N(1)-Ru(1)94.8(3)

C(12)-N(1)-Ru(1)140.1(4)

C(11)-N(2)-C(15)123.4(5)

C(11)-N(2)-Ru(1)94.8(3)

C(15)-N(2)-Ru(1)139.0(4)

C(5)-C(1)-C(2)108.2(5)

C(5)-C(1)-C(6)125.3(5)

C(2)-C(1)-C(6)126.5(5)

C(5)-C(1)-Ru(1)71.8(3)

C(2)-C(1)-Ru(1)69.8(3)

C(6)-C(1)-Ru(1)125.2(4)

C(1)-C(2)-C(3)107.8(5)

C(1)-C(2)-C(7)125.9(6)

C(3)-C(2)-C(7)125.6(6)

C(1)-C(2)-Ru(1)72.5(3)

C(3)-C(2)-Ru(1)70.7(3)

C(7)-C(2)-Ru(1)129.9(4)

C(2)-C(3)-C(4)107.5(5)

C(2)-C(3)-C(8)127.1(6)

C(4)-C(3)-C(8)125.0(6)

C(2)-C(3)-Ru(1)71.0(3)

C(4)-C(3)-Ru(1)72.8(3)

C(8)-C(3)-Ru(1)127.7(4)

C(5)-C(4)-C(3)107.7(5)

C(5)-C(4)-C(9)127.0(5)

C(3)-C(4)-C(9)125.2(5)

C(5)-C(4)-Ru(1)71.5(3)

C(3)-C(4)-Ru(1)69.1(3)

C(9)-C(4)-Ru(1)127.9(4)

C(4)-C(5)-C(1)108.7(5)

C(4)-C(5)-C(10)126.5(5)

C(1)-C(5)-C(10)124.7(5)

C(4)-C(5)-Ru(1)71.6(3)

C(1)-C(5)-Ru(1)71.0(3)

C(10)-C(5)-Ru(1)126.9(4)

N(1)-C(11)-N(2)108.8(5)

N(1)-C(11)-C(18)125.7(5)

N(2)-C(11)-C(18)125.5(5)

N(1)-C(11)-Ru(1)54.7(3)

N(2)-C(11)-Ru(1)54.4(3)

C(18)-C(11)-Ru(1)176.5(4)

N(1)-C(12)-C(13)112.0(5)

N(1)-C(12)-C(14)110.1(5)

C(13)-C(12)-C(14)112.8(6)

N(2)-C(15)-C(17)110.5(5)

N(2)-C(15)-C(16)112.6(6)

C(17)-C(15)-C(16)113.1(7)

Symmetry transformations used to generate equivalent atoms:

**Table S-1-4** Anisotropic displacement parameters (Å x 10) for NHK163. The anisotropic displacement factor exponent takes the form: -2  [ h a* U11 + ... + 2 h k a* b* U

Atom U11 U22 U33 U23 U13 U12

Ru(1)34(1)34(1)36(1)-1(1)-2(1)3(1)

Cl(1)63(1)42(1)89(1)-21(1)-17(1)9(1)

N(1)46(3)40(2)43(3)0(2)-8(2)3(2)

N(2)39(2)50(3)50(2)-11(3)3(2)4(2)

C(1)33(2)38(3)61(3)2(3)-5(2)4(2)

C(2)41(3)55(3)46(3)5(3)8(2)13(3)

C(3)47(3)40(3)54(3)-11(3)-12(3)12(2)

C(4)39(3)32(3)57(3)2(2)-8(3)0(2)

C(5)43(3)46(3)44(3)5(3)-4(2)6(2)

C(6)52(4)56(4)97(5)2(4)-17(4)-11(3)

C(7)69(4)101(6)62(4)16(4)19(3)31(4)

C(8)90(5)62(4)88(5)-37(4)-26(4)15(4)

C(9)58(4)48(4)114(6)20(4)2(4)-6(3)

C(10)70(4)79(5)56(4)2(4)-12(3)7(4)

C(11)41(3)36(3)53(3)-8(2)-12(2)6(2)

C(12)59(4)63(4)51(4)11(3)-12(3)-2(3)

C(13)107(6)100(6)42(3)-1(4)-10(3)-11(5)

C(14)113(7)83(5)85(6)20(5)-2(5)-36(5)

C(15)52(3)70(4)68(4)-5(3)20(3)-7(3)

C(16)70(5)95(6)114(7)7(5)22(5)-28(4)

C(17)121(7)160(9)64(4)-39(6)36(4)-64(7)

C(18)43(3)74(4)89(5)-15(4)-22(3)0(3)

**S-2 Molecular Structure and Crystallographic Data for 8**


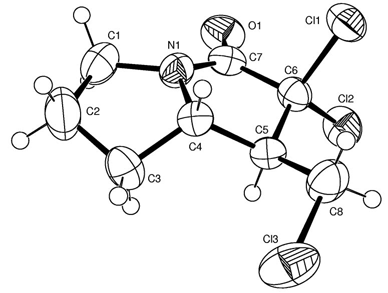


**Figure S-2-1.** ORTEP drawing of **8** with 50% thermal ellipsoids.

**Table S-2-1** Crystal data and structure refinement for **8**.

Identification code shelxl

Empirical formula C8 H10 Cl3 N O

Formula weight 242.52

Temperature 293(2) K

Wavelength 0.71069 Å

Crystal system Orthorhombic

Space group P212121

Unit cell dimensions a = 9.3085(6)Å  = 90°

b = 15.064(1)Å  = 90°

c = 7.4597(4)Å  = 90°

Volume 1046.0(1) Å3

Z 4

Density (calculated) 1.540 Mg/m3

Absorption coefficient 0.835 mm-1

F(000) 496

Crystal size 0.70 x 0.40 x 0.35 mm

Theta range for data collection 2.57 to 27.47 °.

Index ranges -12<=h<=12; -19<=k<=19; -9<=l<=9

Reflections collected 2371

Independent reflections 2371 [R(int) = 0.0000]

Reflections observed (>2) 1827

Refinement method Full-matrix least-squares on F2

Data / restraints / parameters 2371 / 0 / 119

Goodness-of-fit on F2 0.966

Final R indices [I>2(I)] R1 = 0.0333 wR2 = 0.0685

R indices (all data) R1 = 0.0463 wR2 = 0.0741

Absolute structure parameter 0.07(8)

Largest diff. peak and hole 0.188 and -0.248 e.Å-3

**Table S-2-2** Atomic coordinates ( x 104) and equivalent isotropic displacement parameters (Å2 x 103) for **8**.U(eq) is defined as one third of the trace of the orthogonalized Uij tensor.

Atom x y z U(eq)

Cl(1) 345(1) 1587(1) 4037(1) 56(1)

Cl(2) 2754(1) 1539(1) 6494(1) 62(1)

Cl(3) 4323(1) 764(1) 345(1) 76(1)

O(1) 1721(2) 3458(1) 5841(3) 66(1)

N(1) 2323(2) 3293(1) 2873(2) 45(1)

C(1) 2689(3) 4193(2) 2278(4) 61(1)

C(2) 3530(4) 4020(2) 540(4) 77(1)

C(3) 4045(3) 3068(2) 674(4) 57(1)

C(4) 2823(2) 2605(1) 1637(3) 40(1)

C(5) 3154(2) 1820(2) 2879(3) 39(1)

C(6) 2133(3) 1991(2) 4456(3) 44(1)

C(7) 2021(2) 3016(2) 4525(3) 46(1)

C(8) 3024(3) 898(2) 2073(4) 60(1)

**Table S-2-3** Bond lengths [Å] and angles [°] for **8**.

Cl(1)-C(6) 1.800(2)

Cl(2)-C(6) 1.763(2)

Cl(3)-C(8) 1.779(3)

O(1)-C(7) 1.218(3)

N(1)-C(7) 1.332(3)

N(1)-C(4) 1.464(3)

N(1)-C(1) 1.467(3)

C(1)-C(2) 1.537(4)

C(2)-C(3) 1.516(4)

C(3)-C(4) 1.515(3)

C(4)-C(5) 1.534(3)

C(5)-C(8) 1.517(3)

C(5)-C(6) 1.534(3)

C(6)-C(7) 1.548(4)

C(7)-N(1)-C(4) 115.3(2)

C(7)-N(1)-C(1) 128.3(2)

C(4)-N(1)-C(1) 113.0(2)

N(1)-C(1)-C(2) 102.5(2)

C(3)-C(2)-C(1) 105.4(2)

C(4)-C(3)-C(2) 103.3(2)

N(1)-C(4)-C(3) 102.2(2)

N(1)-C(4)-C(5) 103.3(2)

C(3)-C(4)-C(5) 119.4(2)

C(8)-C(5)-C(6) 114.1(2)

C(8)-C(5)-C(4) 127.8(2)

C(6)-C(5)-C(4) 102.1(2)

C(5)-C(6)-C(7) 103.6(2)

C(5)-C(6)-Cl(2) 113.2(2)

C(7)-C(6)-Cl(2) 112.2(2)

C(5)-C(6)-Cl(1) 112.5(2)

C(7)-C(6)-Cl(1) 106.3(2)

Cl(2)-C(6)-Cl(1) 119.8(1)

O(1)-C(7)-N(1) 128.5(3)

O(1)-C(7)-C(6) 126.0(2)

N(1)-C(7)-C(6) 105.5(2)

C(5)-C(8)-Cl(3) 109.7(2)

Symmetry transformations used to generate equivalent atoms:

**Table S-2-4** Anisotropic displacement parameters (Å2 x 103) for **8**. The anisotropic displacement factor exponent takes the form: -2 2 [ h2 a*2 U11 + ... + 2 h k a* b* U

Atom U11 U22 U33 U23 U13 U12

Cl(1) 43(1) 65(1) 59(1) 4(1) 1(1) -9(1)

Cl(2) 66(1) 78(1) 41(1) 14(1) -5(1) -5(1)

Cl(3) 88(1) 79(1) 61(1) -20(1) 5(1) 31(1)

O(1) 65(1) 73(1) 60(1) -23(1) 16(1) 6(1)

N(1) 48(1) 39(1) 48(1) -2(1) 2(1) 3(1)

C(1) 71(2) 44(2) 68(2) 1(1) -10(1) 4(2)

C(2) 91(2) 61(2) 79(2) 20(2) 13(2) -11(2)

C(3) 58(1) 63(2) 48(1) 3(1) 13(1) -9(1)

C(4) 41(1) 43(1) 36(1) -1(1) -2(1) 1(1)

C(5) 37(1) 43(1) 38(1) -2(1) -1(1) 4(1)

C(6) 43(1) 51(1) 38(1) 4(1) 1(1) -2(1)

C(7) 36(1) 53(2) 48(1) -8(1) 3(1) 3(1)

C(8) 71(2) 46(2) 61(2) -7(1) 6(1) 8(1)

**Table S-3-5** Hydrogen coordinates ( x 104) and isotropic displacement parameters (Å2 x 103) for **8**.

Atom x y z U(eq)

H(1A) 3277 4497 3158 73

H(1B) 1832 4542 2049 73

H(2A) 2916 4098 -498 93

H(2B) 4339 4424 442 93

H(3A) 4200 2814 -505 68

H(3B) 4929 3029 1358 68

H(4) 2062 2447 788 48

H(5) 4139 1890 3318 47

H(8A) 2067 817 1585 71

H(8B) 3176 455 2996 71
